# Supplementary material for: Health-related Quality of Life of Patients With Non–Intra-abdominal Desmoid-Type Fibromatosis During Active Surveillance: Results of a Prospective Observational Study
Source: PubMed Central journal article supplement (PMC10174102; doi:10.1097/sla.0000000000005795), 2023-01-19
Supplement: sla-277-00877-s001.pdf [file sla-277-00877-s001.pdf]

**Supplemental Table 1.** Number of Desmoid-type Fibromatosis patients who were under active surveillance or on/after active treatment and who completed the EORTC QLQ-C30 questionnaire per follow-up visit.  
n (%), percentage of total patients on active surveillance or on/after active treatment at specific follow-up visit

| Follow-up visit |           | Number of patients     |                           |
|-----------------|-----------|------------------------|---------------------------|
|                 |           | On active surveillance | On/after active treatment |
| Baseline        | Total     | 105                    | -                         |
|                 | Completed | 95 (91%)               | -                         |
| 6 months        | Total     | 99                     | 6                         |
|                 | Completed | 83 (84%)               | 5 (83%)                   |
| 12 months       | Total     | 86                     | 19                        |
|                 | Completed | 68 (79%)               | 15 (79%)                  |
| 24 months       | Total     | 75                     | 30                        |
|                 | Completed | 54 (72%)               | 21 (70%)                  |
